# Supplementary material for: Defect-engineered metal–organic frameworks (MOF-808) towards the improved adsorptive removal of organic dyes and chromium (vi) species from water
Source: Royal Society of Chemistry journal article supplement (doi:10.1039/d2nj05693c), 2023-01-01
Supplement: d2nj05693c1.pdf [file d2nj05693c1.pdf]

## Supplementary Materials

# Defect-engineered Metal-Organic Framework (MOF-808) towards the Improved Adsorptive Removal of Organic Dyes and Chromium (VI) Species from Water

Khoa D. Nguyen,<sup>a,b</sup> Nhi T. Vo,<sup>a,b</sup> Khanh T. M. Le,<sup>a,b</sup> Khanh V. Ho,<sup>a,b</sup> Nam T. S. Phan,<sup>a,b</sup> Phuoc H. Ho,<sup>c\*</sup> Ha

V. Le<sup>a,b\*</sup>

<sup>a</sup> Department of Chemical Engineering, Ho Chi Minh University of Technology (HCMUT), 268 Ly Thuong Kiet street, District 10, Ho Chi Minh City, 70000 Vietnam.

<sup>b</sup> Vietnam National University Ho Chi Minh city, Linh Trung Ward, Ho Chi Minh City, 70000 Vietnam.

<sup>c</sup> Chemical Engineering, Competence Centre for Catalysis, Chalmers University of Technology, Gothenburg, SE-412 96, Sweden.

### Corresponding Authors

\* E-mail: [phuoc@chalmers.se](mailto:phuoc@chalmers.se) (Phuoc. H. Ho); and [lvha@hcmut.edu.vn](mailto:lvha@hcmut.edu.vn) (Ha V. Le)

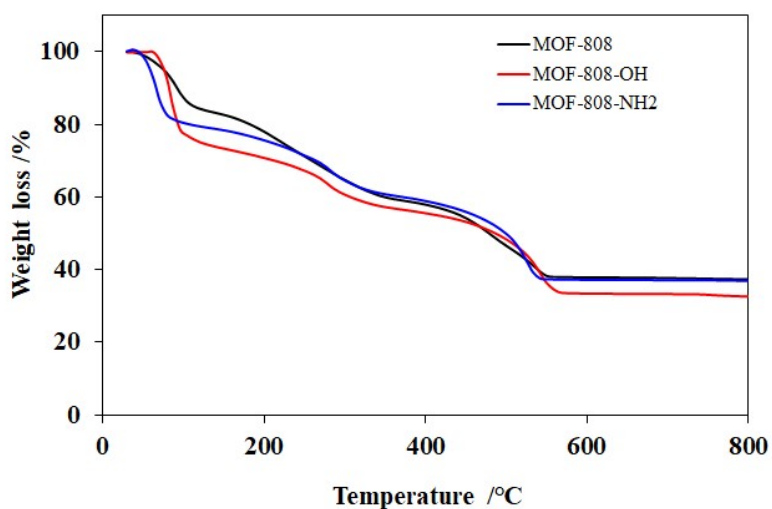

**Figure S1.** TGA profiles of the pristine and defective MOF-808.

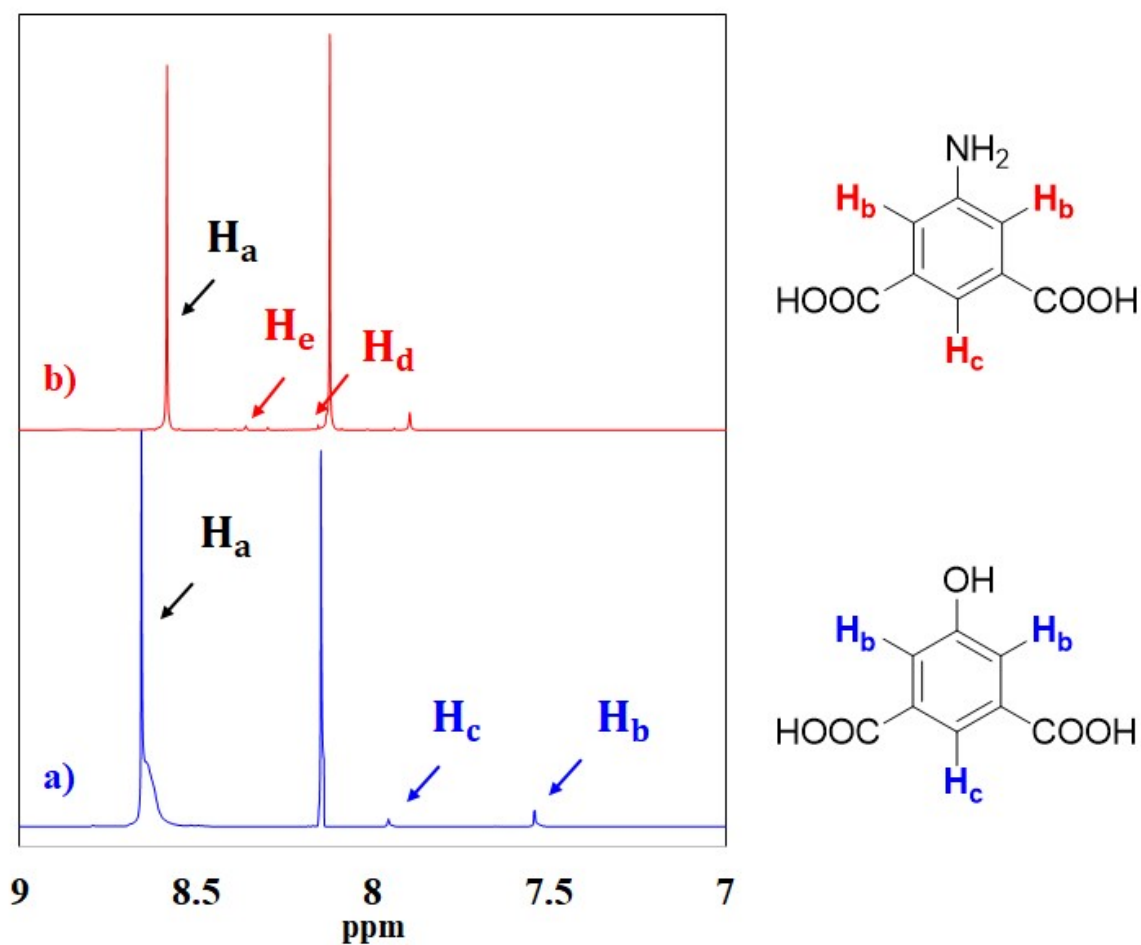

**Figure S2.** NMR spectra of defective MOF-808 analogues as employing 50 mol% of defective inducers.

**Table S1.** Maximum adsorption wavelength of organic dyes and potassium dichromate.

| Adsorbate            | Maximum adsorption wavelength (nm) |
|----------------------|------------------------------------|
| Sunset yellow        | 482                                |
| Quinoline yellow     | 441                                |
| Methyl orange        | 464                                |
| Methylene blue       | 664                                |
| Malachite green      | 618                                |
| Potassium dichromate | 351                                |

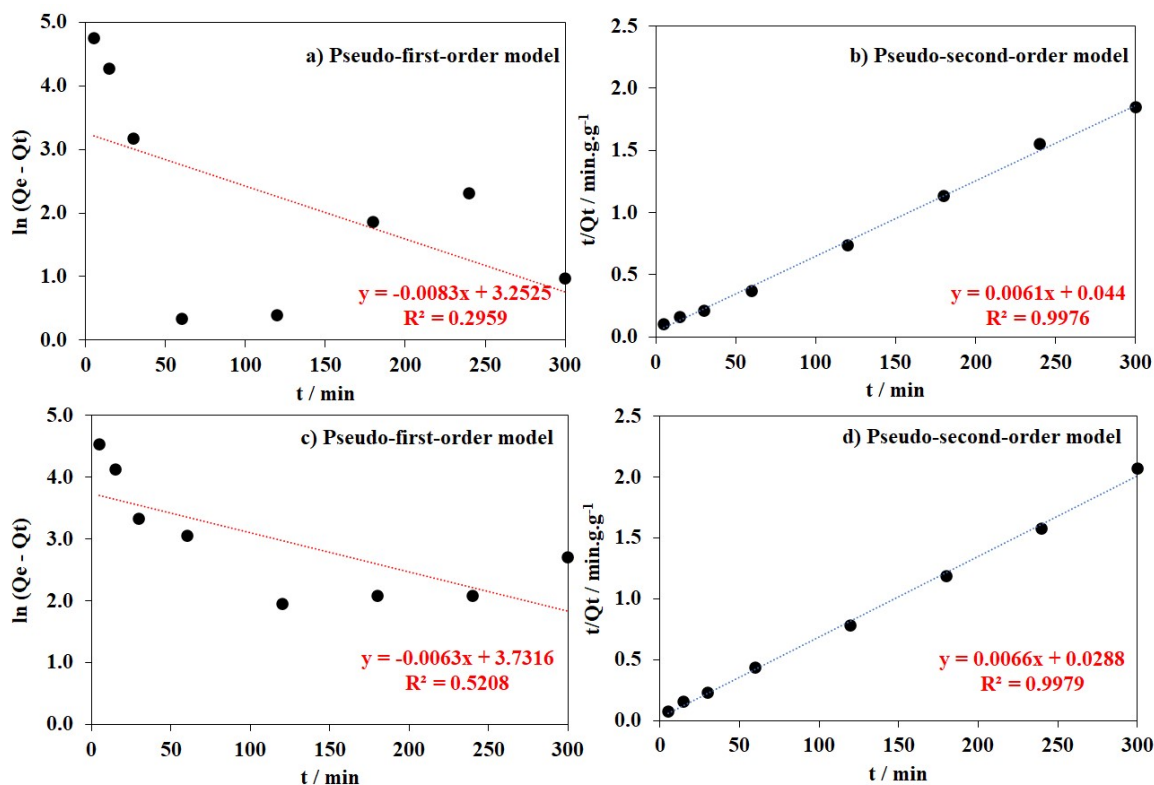

**Figure S3.** Pseudo first-order and second-order model of Cr (VI) anion adsorption processes as employing MOF-808-OH (a and b) and MOF-808-NH<sub>2</sub> (c and d).

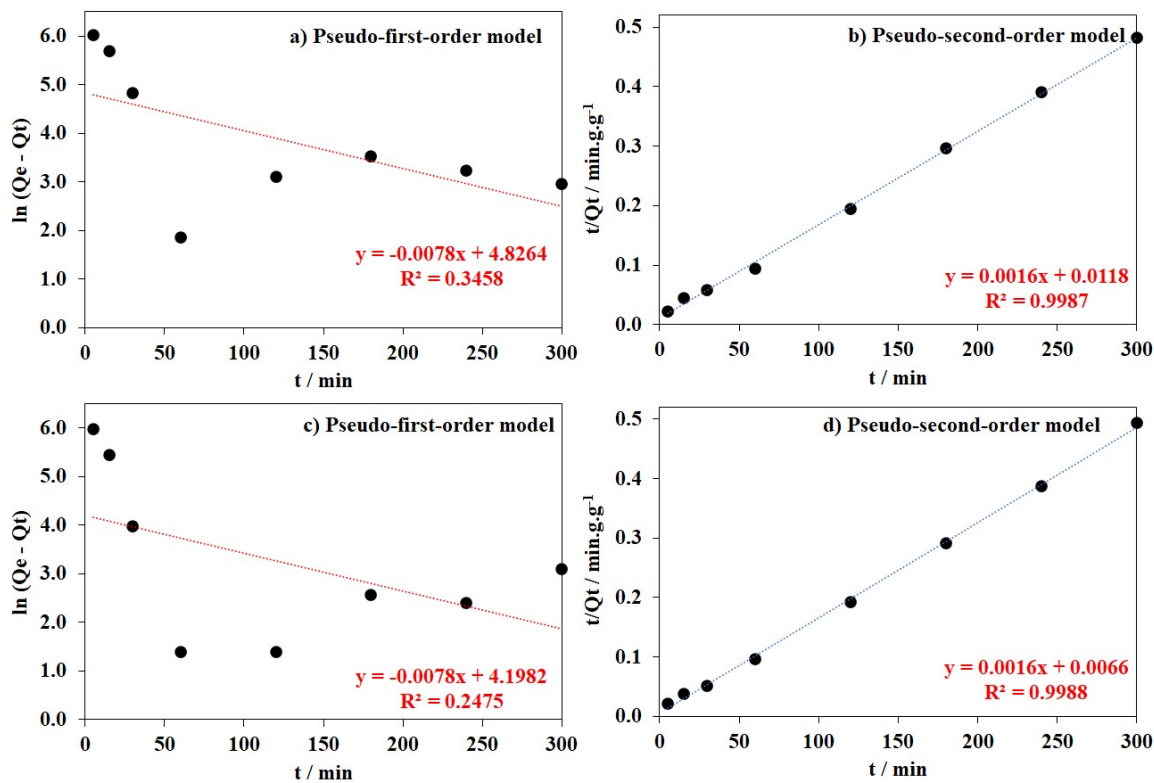

**Figure S4.** Pseudo first-order and second-order model of sunset yellow adsorption processes as employing MOF-808-OH (a and b) and MOF-808-NH<sub>2</sub> (c and d).

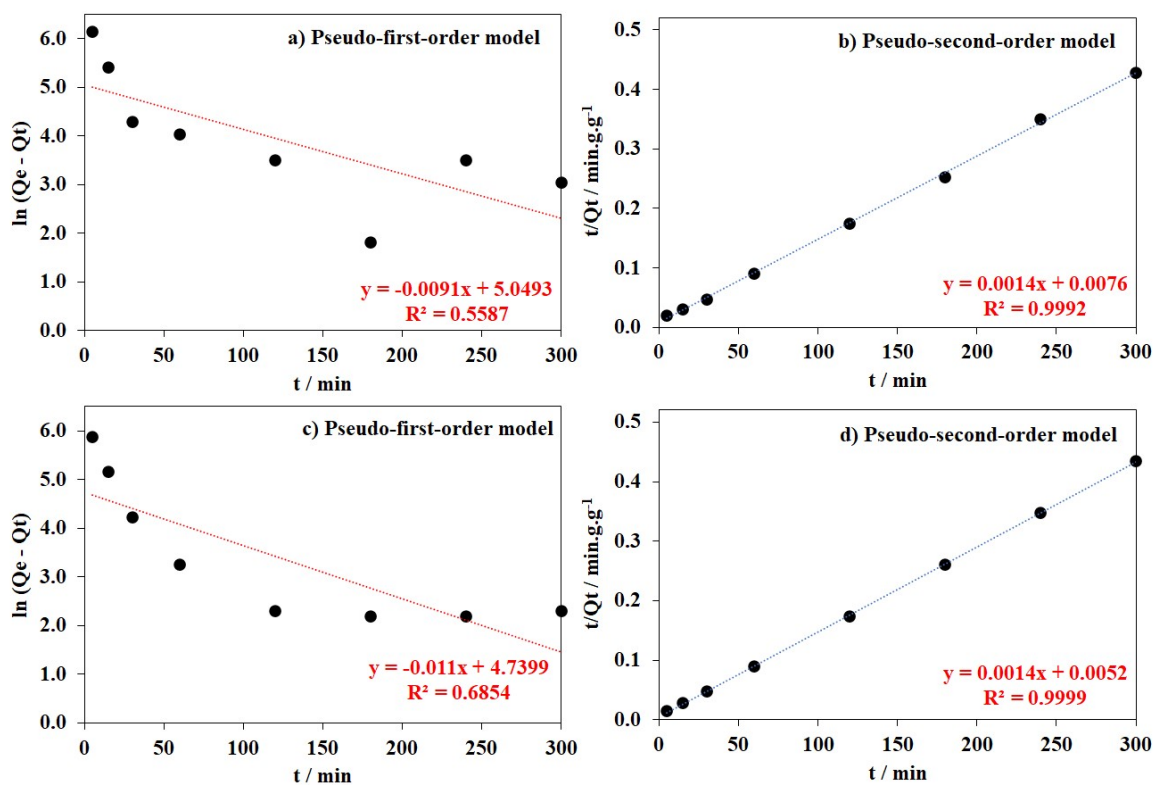

**Figure S5.** Pseudo first-order and second-order model of methyl orange processes as employing MOF-808-OH (a and b) and MOF-808-NH<sub>2</sub> (c and d).

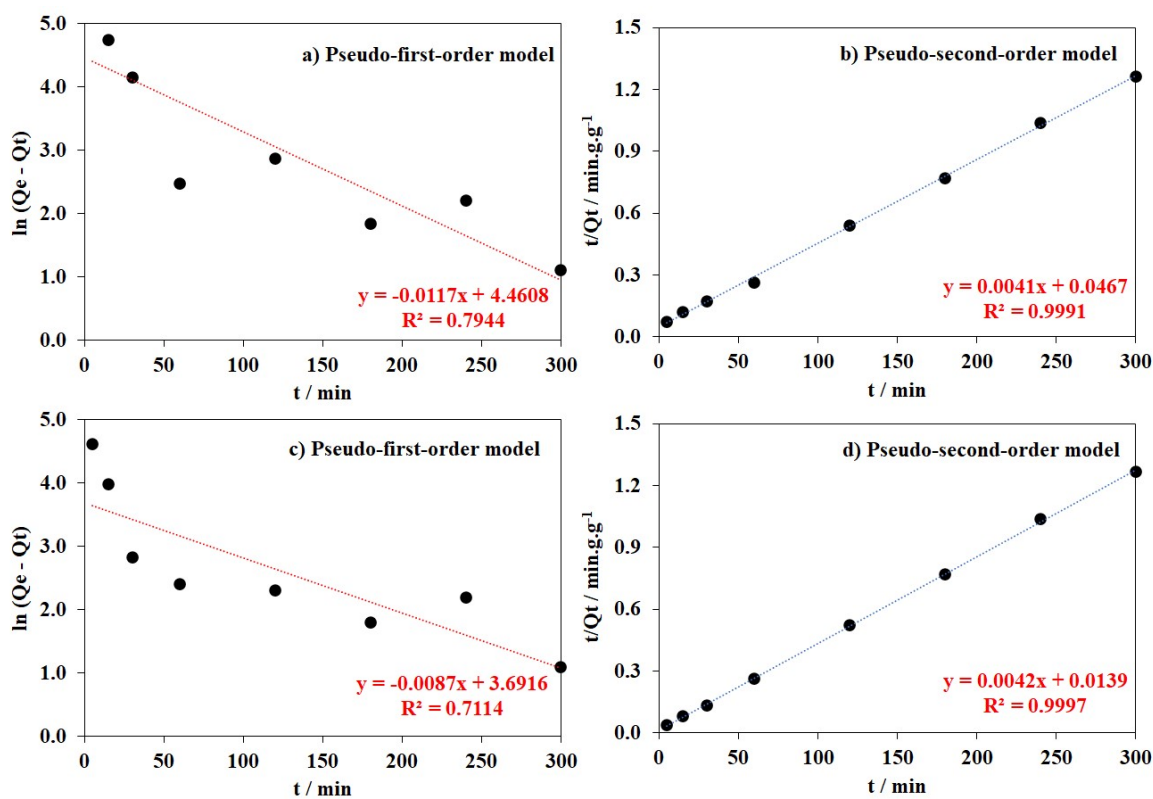

**Figure S6.** Pseudo first-order and second-order model of methyl blue processes as employing MOF-808-OH (a and b) and MOF-808-NH<sub>2</sub> (c and d).

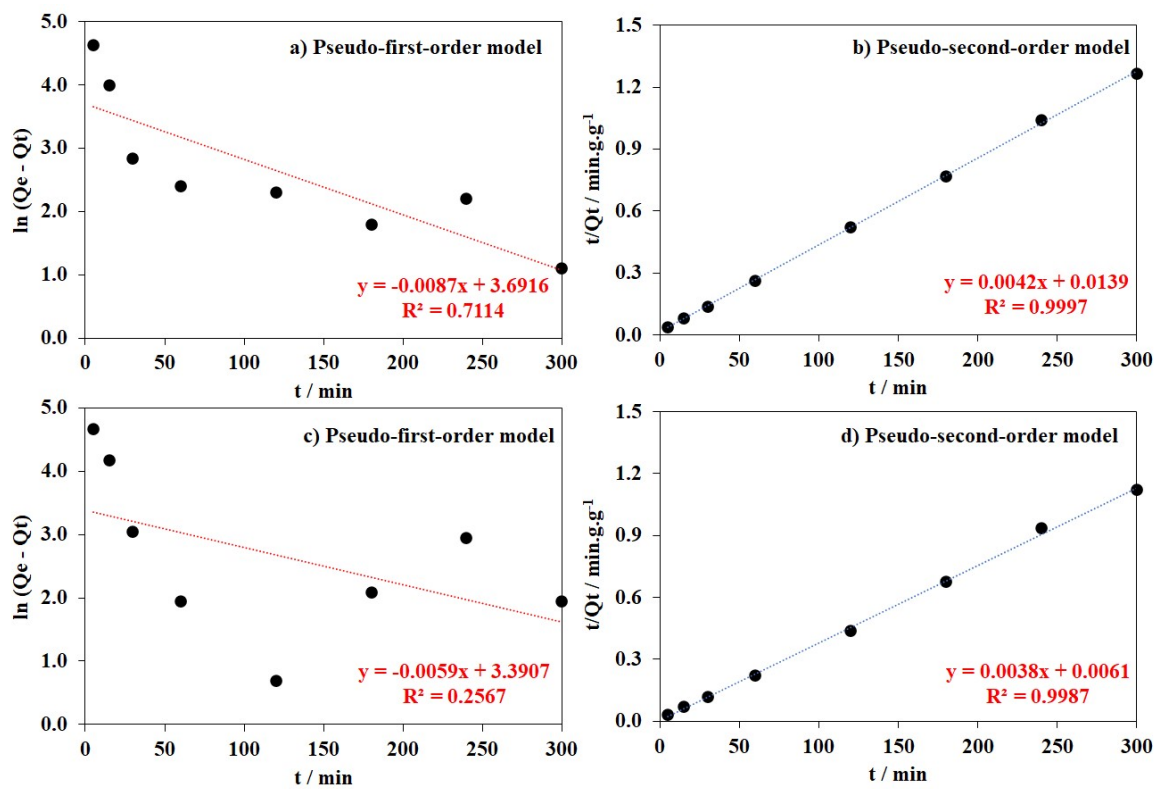

**Figure S7.** Pseudo first-order and second-order model of malachite green processes as employing MOF-808-OH (a and b) and MOF-808-NH<sub>2</sub> (c and d).

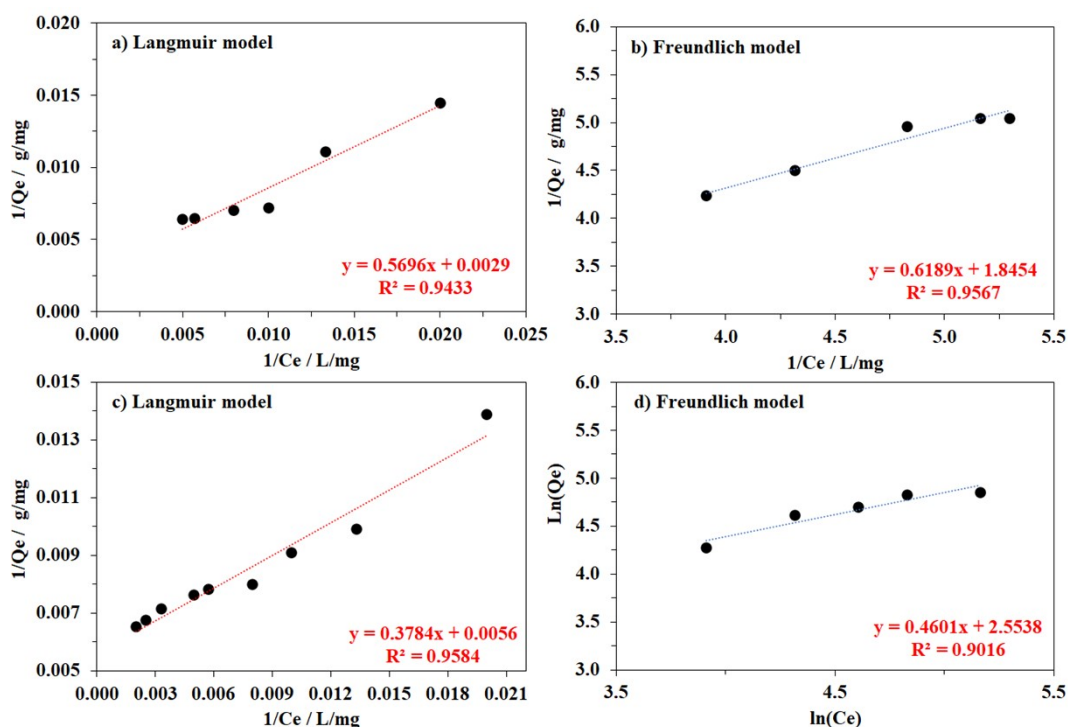

**Figure S8.** Dichromate adsorption isotherms of the MOF-808-OH (a and b) and MOF-808-NH<sub>2</sub> (c and d) fitting by Langmuir model and Freundlich model.

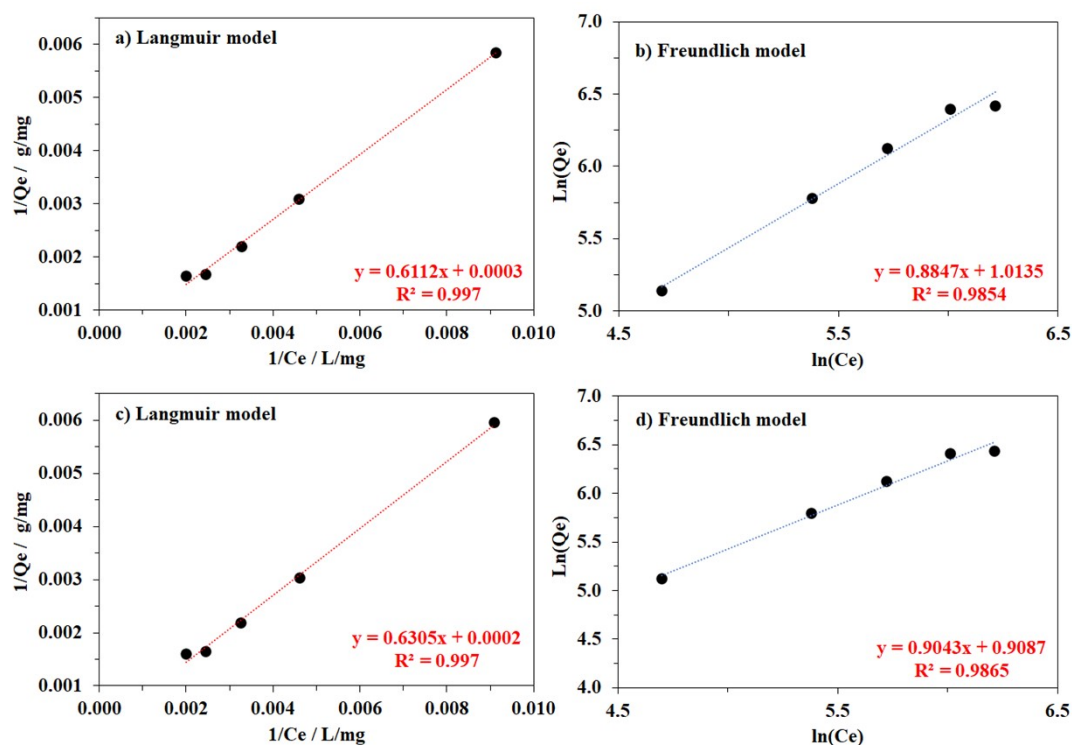

**Figure S9.** Sunset yellow adsorption isotherms of the MOF-808-OH (a and b) and MOF-808-NH<sub>2</sub> (c and d) fitting by Langmuir model and Freundlich model.

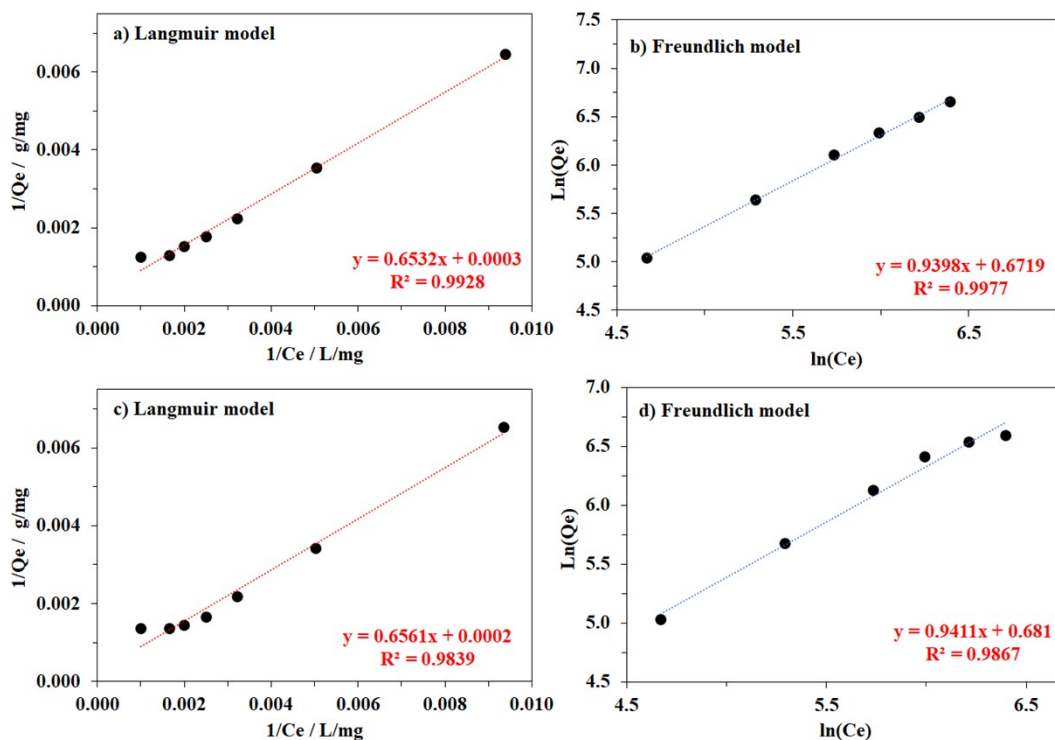

**Figure S10.** Methyl orange adsorption isotherms of the MOF-808-OH (a and b) and MOF-808-NH<sub>2</sub> (c and d) fitting by Langmuir model and Freundlich model.

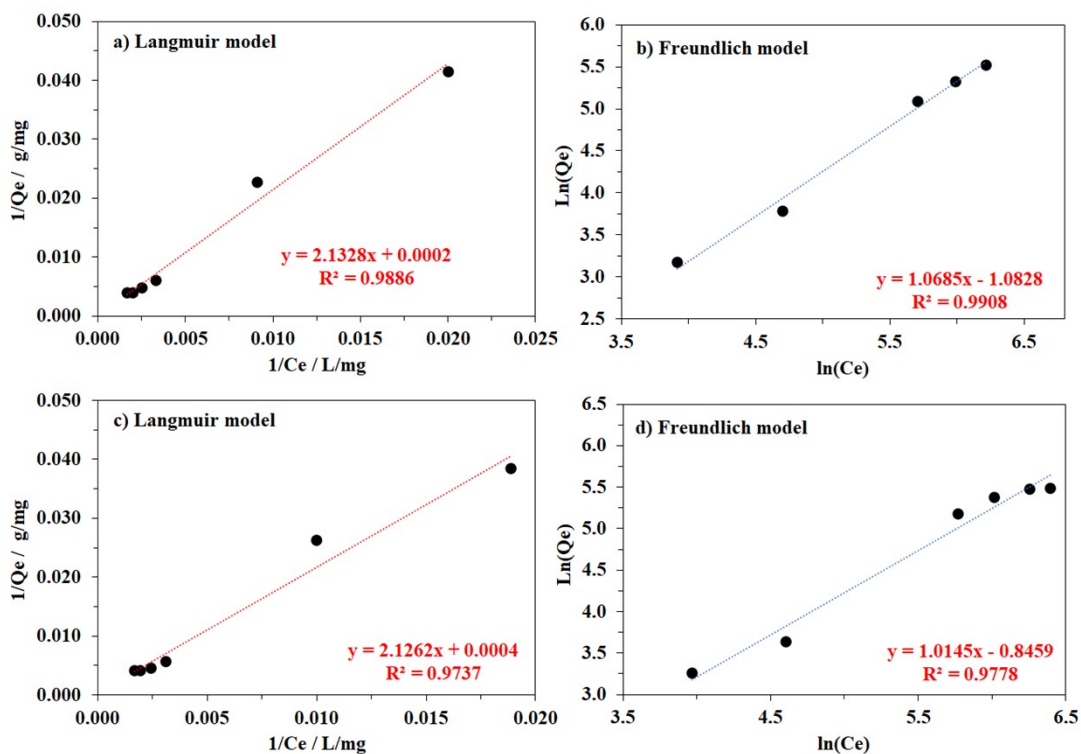

**Figure S11.** Methyl blue adsorption isotherms of the MOF-808-OH (a and b) and MOF-808-NH<sub>2</sub> (c and d) fitting by Langmuir model and Freundlich model.

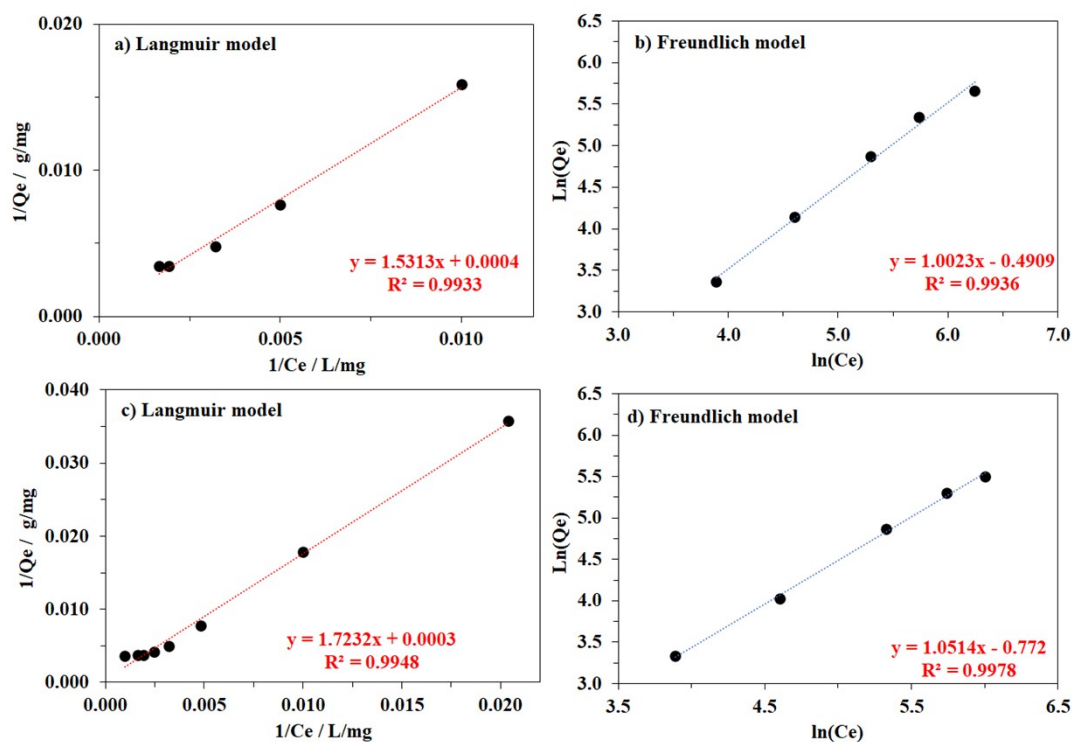

**Figure S12.** Malachite green adsorption isotherms of the MOF-808-OH (a and b) and MOF-808-NH<sub>2</sub> (c and d) fitting by Langmuir model and Freundlich model.

**Table S2.** Isotherm parameters of Langmuir and Freundlich models for adsorption processes of MOF-808-OH and MOF-808-NH<sub>2</sub>

| N. | Sample          | Langmuir                 |                          |                |                          |                          |                | Freundlich |                         |                |                         |                         |                |
|----|-----------------|--------------------------|--------------------------|----------------|--------------------------|--------------------------|----------------|------------|-------------------------|----------------|-------------------------|-------------------------|----------------|
|    |                 | MOF-808-OH               |                          |                | MOF-808-NH <sub>2</sub>  |                          |                | MOF-808-OH |                         |                | MOF-808-NH <sub>2</sub> |                         |                |
|    |                 | K <sub>L</sub><br>(L/mg) | Q <sub>L</sub><br>(mg/g) | R <sup>2</sup> | K <sub>L</sub><br>(L/mg) | Q <sub>L</sub><br>(mg/g) | R <sup>2</sup> | n          | K <sub>F</sub><br>(L/g) | R <sup>2</sup> | n                       | K <sub>F</sub><br>(L/g) | R <sup>2</sup> |
| 1  | Cr(VI)<br>anion | 0.0051                   | 346                      | 0.953          | 0.0148                   | 179                      | 0.958          | 1.62       | 6.33                    | 0.957          | 2.17                    | 12.86                   | 0.902          |
| 2  | SY              | 0.0004                   | 3797                     | 0.997          | 0.0003                   | 5434                     | 0.997          | 1.13       | 2.76                    | 0.985          | 1.11                    | 2.48                    | 0.987          |
| 3  | QY              | 0.0005                   | 3321                     | 0.980          | 0.0006                   | 2636                     | 0.984          | 1.02       | 1.65                    | 0.995          | 1.04                    | 1.83                    | 0.999          |
| 4  | MO              | 0.0004                   | 3759                     | 0.993          | 0.0004                   | 4060                     | 0.984          | 1.06       | 1.96                    | 0.998          | 1.06                    | 1.98                    | 0.998          |
| 5  | MB              | 0.0001                   | 16170                    | 0.988          | 0.0002                   | 2386                     | 0.974          | 0.94       | 0.34                    | 0.991          | 0.99                    | 0.43                    | 0.978          |
| 6  | MG              | 0.0002                   | 2755                     | 0.993          | 0.0002                   | 2883                     | 0.995          | 0.99       | 0.61                    | 0.994          | 0.95                    | 0.46                    | 0.998          |



**Table S3.** Recycling tests of defective MOF-808 analogues as adsorbents for removing Cr (VI) anions, sunset yellow (SY), quinoline yellow (QY), methyl orange (MO) from aqueous solution

| <b>Adsorbent</b>             | <b>MOF-808-OH</b>        |                      |                      |                      | <b>MOF-808-NH<sub>2</sub></b> |                      |                      |                      |
|------------------------------|--------------------------|----------------------|----------------------|----------------------|-------------------------------|----------------------|----------------------|----------------------|
| <b>Adsorbate</b>             | <b>Cr(VI)<br/>(mg/g)</b> | <b>SY<br/>(mg/g)</b> | <b>QY<br/>(mg/g)</b> | <b>MO<br/>(mg/g)</b> | <b>Cr(VI)<br/>(mg/g)</b>      | <b>SY<br/>(mg/g)</b> | <b>QY<br/>(mg/g)</b> | <b>MO<br/>(mg/g)</b> |
| <b>1st run</b>               | 164                      | 612                  | 701                  | 659                  | 153                           | 626                  | 702                  | 690                  |
| <b>2nd run</b>               | 161                      | 605                  | 687                  | 650                  | 151                           | 615                  | 691                  | 673                  |
| <b>3rd run</b>               | 159                      | 595                  | 680                  | 641                  | 142                           | 608                  | 679                  | 663                  |
| <b>4th run</b>               | 151                      | 588                  | 671                  | 636                  | 139                           | 599                  | 675                  | 659                  |
| <b>Capacity loss<br/>(%)</b> | 7.9                      | 3.9                  | 4.3                  | 3.5                  | 9.2                           | 4.3                  | 3.8                  | 4.5                  |
